# Supplementary material for: Cryo-electron tomography reveals novel features of a viral RNA replication compartment
Source: eLife journal article supplement (doi:10.7554/elife.25940), 2017-06-26
Supplement: supp [file elife-25940-supp-v1.zip]

Archive with 11 entries (11 files):
- elife_poa_e25940_Video_3.mp4
- elife_poa_e25940_Video_7.mp4
- elife_poa_e25940_Video_2.mp4
- elife_poa_e25940_Figure_7_Figure_Supplement_1.pdf
- elife_poa_e25940_Video_1.mp4
- elife_poa_e25940_Figure_6_Figure_Supplement_1.pdf
- elife_poa_e25940_Figure_3_Figure_Supplement_1.pdf
- elife_poa_e25940_Video_5.mp4
- elife_poa_e25940_Figure_5_Figure_Supplement_1.pdf
- elife_poa_e25940_Video_4.mp4
- elife_poa_e25940_Video_6.mp4
