# Supplementary material for: Cryo-electron tomography reveals novel features of a viral RNA replication compartment
Source: eLife journal article supplement (doi:10.7554/elife.25940), 2017-06-26
Supplement: supp [file elife-25940-supp-v1.zip › elife_poa_e25940_Figure_3_Figure_Supplement_1.pdf]

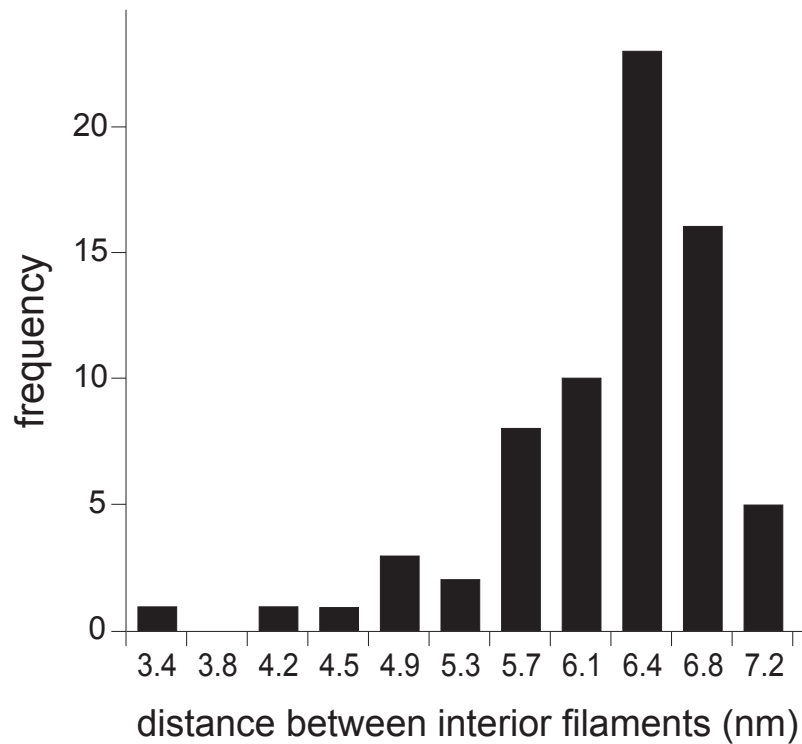

Figure 3 - Figure Supplement 1: **Distribution of center-to-center distance between interior spherule RNA filaments.** Interior densities of FHV spherules were traced and segmented using the Amira program. Distances were measured as the shortest center-to-center spans on tomographic reconstructions such as in Figure 3A using IMOD software (Nicastro et al, 2006).
