# Supplementary material for: Cryo-electron tomography reveals novel features of a viral RNA replication compartment
Source: eLife journal article supplement (doi:10.7554/elife.25940), 2017-06-26
Supplement: supp [file elife-25940-supp-v1.zip › elife_poa_e25940_Figure_5_Figure_Supplement_1.pdf]

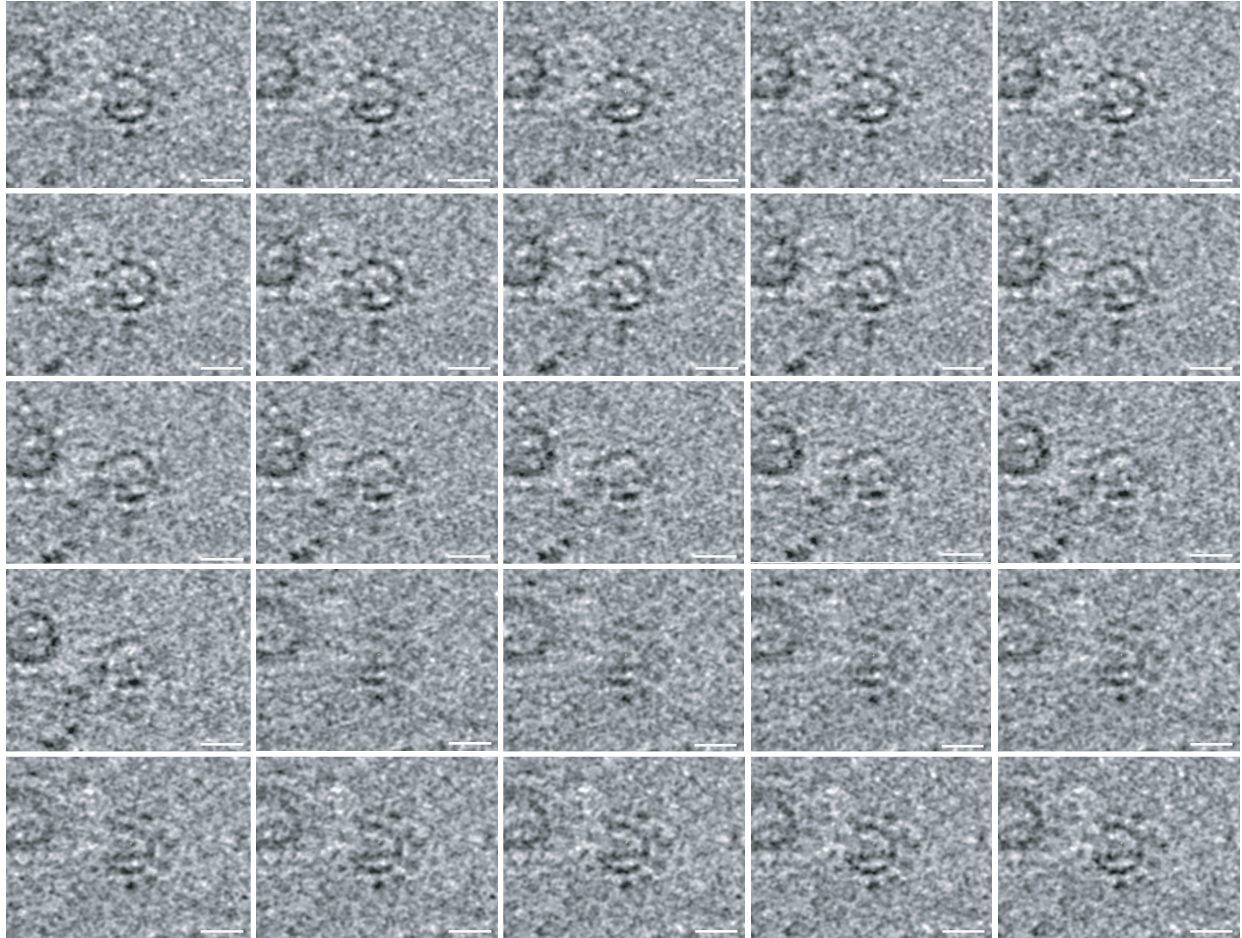

Figure 5 - Figure Supplement 1: **The 12-fold “teeth” at the necks of FHV spherules.** A series of z-plane slices of a cryo-tomogram focusing on FHV crowns shows that even without the greatly-increased resolution from subtomogram averaging, subsets of the 12 teeth densities are readily visible surrounding the central turret structure in the original tomograms. Scale bar = 10 nm.
