# Supplementary material for: Cryo-electron tomography reveals novel features of a viral RNA replication compartment
Source: eLife journal article supplement (doi:10.7554/elife.25940), 2017-06-26
Supplement: supp [file elife-25940-supp-v1.zip › elife_poa_e25940_Figure_6_Figure_Supplement_1.pdf]

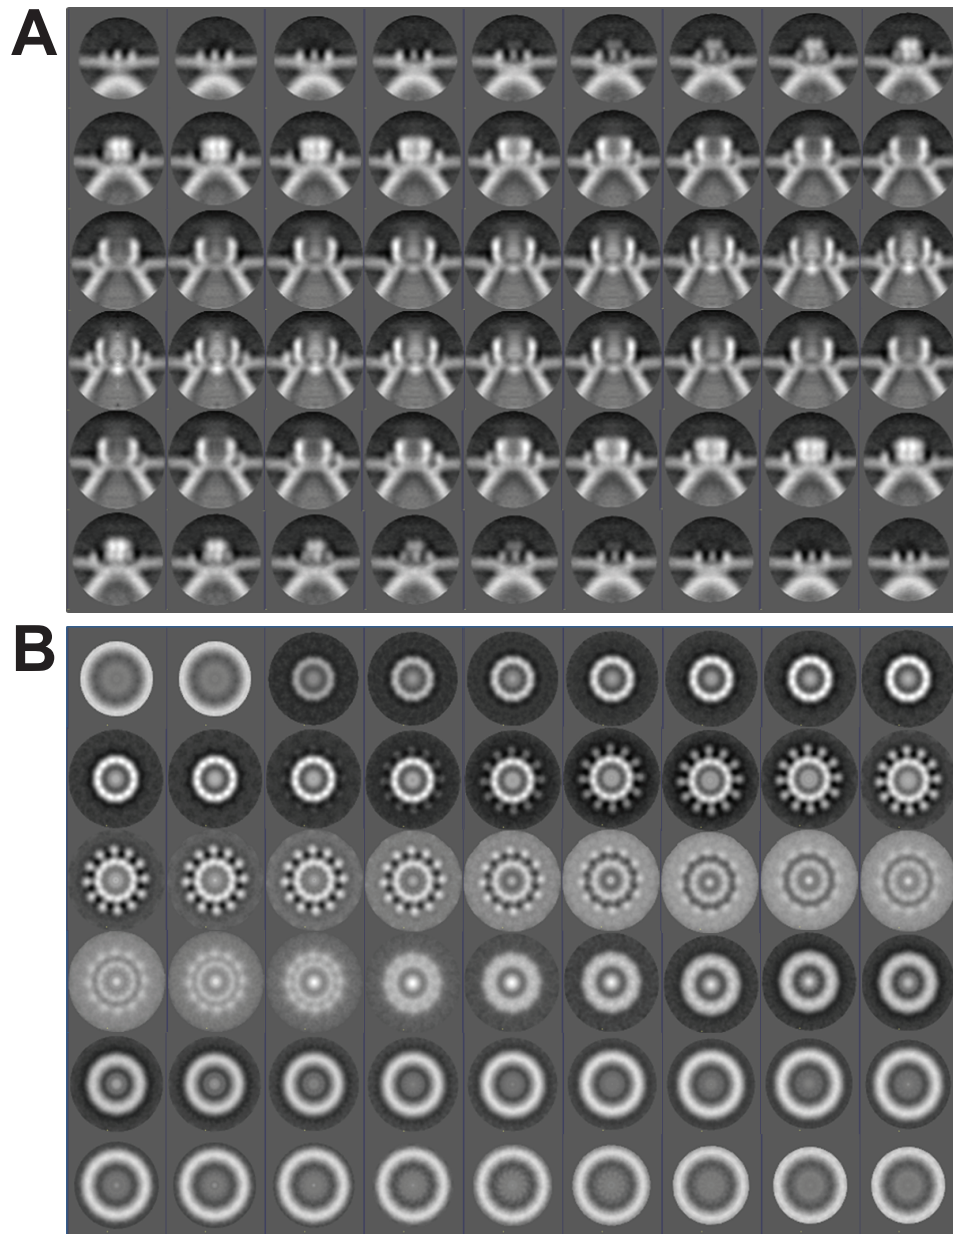

Figure 6 - Figure Supplement 1: **The 12-fold-symmetric FHV crown.** The subtomogram-averaged FHV crown structure represented as a series of slices imaged through the plane perpendicular to the outer mitochondrial membrane (A, “side view”) or perpendicular to the axis passing through the center of the crown to the center of the spherule (B, “top view”). The images start at upper left as viewed from the cytoplasmic side above the crown, and progress toward the pterule center.
