# Supplementary material for: Cryo-electron tomography reveals novel features of a viral RNA replication compartment
Source: eLife journal article supplement (doi:10.7554/elife.25940), 2017-06-26
Supplement: supp [file elife-25940-supp-v1.zip › elife_poa_e25940_Figure_7_Figure_Supplement_1.pdf]

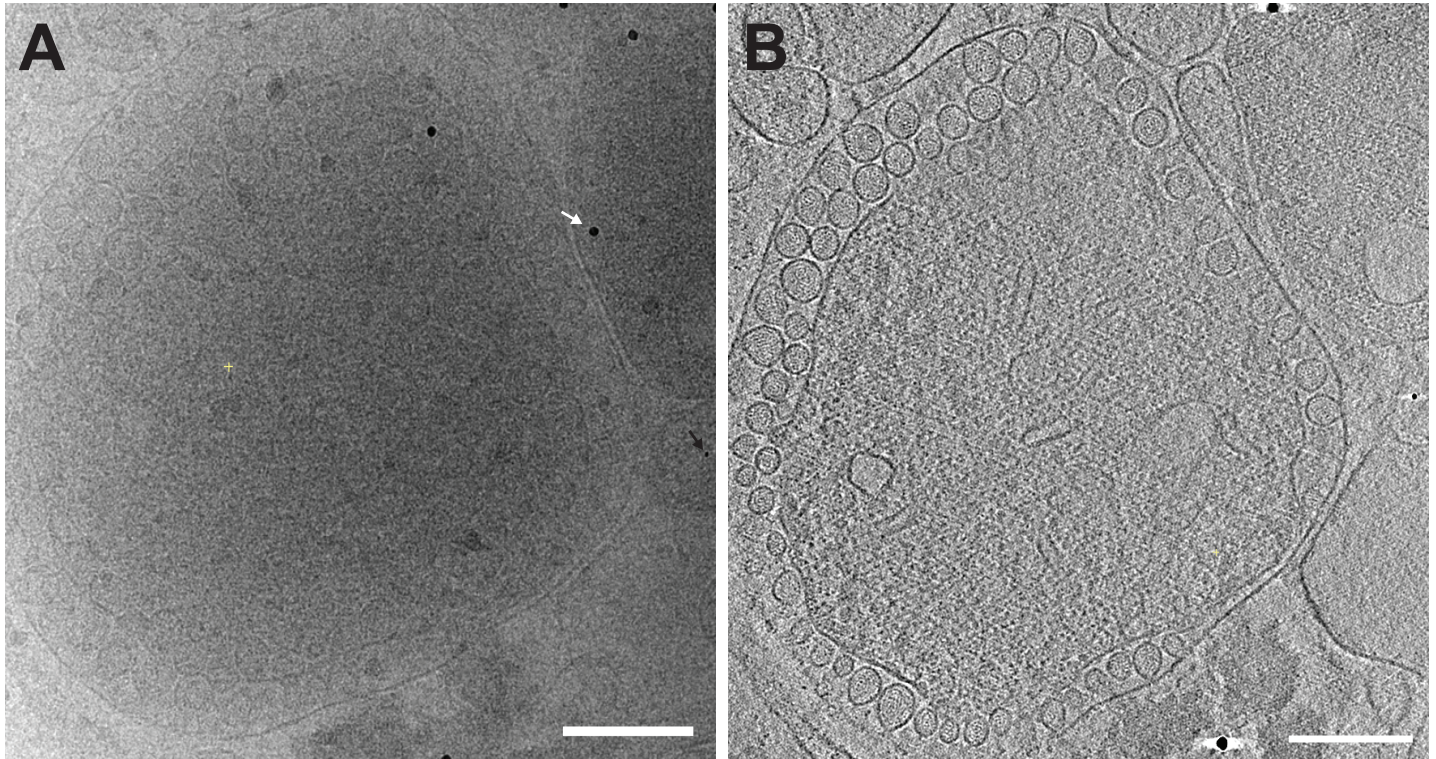

Figure 7 - Figure Supplement 1: **Lack of immune-gold labeling of FHV spherules using a non-specific antibody control.** Under experimental conditions essentially the same as used for the results shown in Figure 7 in the main text of the paper, no specific immunogold labeling was observed using non-FHV-specific negative control IgG rabbit polyclonal antibody. (A) Single image from an acquired tilt-series. Spherules are apparent on the outer mitochondrial membrane. A white arrow indicates a sporadic 6 nm gold particle conjugated to the antibody. A black arrow indicates a smaller gold particle used to align the tilt series. (B) A tomographic slice from the reconstructed tomogram from panel A. Scale bars = 200 nm.
